# Supplementary material for: Accuracy of 11 Wearable, Nearable, and Airable Consumer Sleep Trackers: Prospective Multicenter Validation Study
Source: PubMed Central journal article supplement (PMC10654909; doi:10.2196/50983), 2023-11-02
Supplement: mhealth_v11i1e50983_app1.pdf [file mhealth_v11i1e50983_app1.pdf]

**Multimedia Appendix 1.** The number of observations in each institution.

| <b>Device</b>                    | <b>SNUBH (n)</b> | <b>SNUBH (%)</b> | <b>CLC (n)</b> | <b>CLC (%)</b> |
|----------------------------------|------------------|------------------|----------------|----------------|
| <b>Airable</b>                   |                  |                  |                |                |
| SleepRoutine (67)                | 29               | 78.38            | 38             | 100.00         |
| SleepScore (38)                  | 26               | 70.27            | 12             | 31.58          |
| Pillow (74)                      | 37               | 100.00           | 37             | 97.37          |
| <b>Nearable</b>                  |                  |                  |                |                |
| Withings Sleep Tracking Mat (75) | 37               | 100.00           | 38             | 100.00         |
| Google Nest Hub 2 (33)           | 14               | 77.78            | 19             | 100.00         |
| Amazon Halo Rise (28)            | 12               | 63.16            | 16             | 84.21          |
| <b>Wearable</b>                  |                  |                  |                |                |
| Google Pixel Watch (30)          | 12               | 66.67            | 18             | 94.74          |
| Galaxy Watch 5 (22)              | 3                | 15.79            | 19             | 100.00         |
| Fitbit Sense 2 (26)              | 9                | 50.00            | 17             | 89.47          |
| Apple Watch 8 (26)               | 8                | 42.11            | 18             | 94.74          |
| Oura Ring 3 (53)                 | 22               | 59.46            | 31             | 81.58          |

The numbers and percentages in the table represent the number of participants measured for each CST and the success rate of data collection at the two institutions.
