# Supplementary material for: Accuracy of 11 Wearable, Nearable, and Airable Consumer Sleep Trackers: Prospective Multicenter Validation Study
Source: PubMed Central journal article supplement (PMC10654909; doi:10.2196/50983), 2023-11-02
Supplement: mhealth_v11i1e50983_app2.pdf [file mhealth_v11i1e50983_app2.pdf]

**Multimedia Appendix 2.** Comparative analysis of participant demographics across institutions (multi-tracker group A vs multi-tracker group B).

|                                    | SNUBH                 |                       |        | CLS                   |                       |        |
|------------------------------------|-----------------------|-----------------------|--------|-----------------------|-----------------------|--------|
|                                    | Multi-tracker group A | Multi-tracker group B | P      | Multi-tracker group A | Multi-tracker group B | P      |
| Number of participants             | 18                    | 19                    |        | 19                    | 19                    |        |
| Male, % (n)                        | 72.22(13)             | 73.68(14)             | -      | 10.53 (2)             | 52.63 (10)            | -      |
| Age, years                         | 55.0±12.41            | 52.05±11.67           | 0.4615 | 35.0±10.58            | 32.89±4.45            | 0.4291 |
| Body mass index, kg/m <sup>2</sup> | 24.12±4.35            | 25.13±3.85            | 0.4615 | 22.71±3.91            | 23.64±4.1             | 0.4786 |
| Time in bed, hours                 | 8.02±0.22             | 8.01±0.39             | 0.9371 | 6.48±0.69             | 6.5±0.65              | 0.9535 |
| Total sleep time, hours            | 6.34±1.16             | 6.19±1.26             | 0.7133 | 5.21±1.49             | 5.59±1.17             | 0.3978 |
| Sleep latency, hours               | 0.26±0.38             | 0.28±0.39             | 0.8650 | 0.32±0.38             | 0.2±0.37              | 0.3544 |
| Wake After Sleep Onset, hours      | 1.42±1.09             | 1.54±1.35             | 0.7722 | 0.95±1.45             | 0.71±1.0              | 0.5484 |
| Sleep efficiency, %                | 79.15±14.74           | 77.69±16.63           | 0.7809 | 80.88±21.64           | 86.19±16.34           | 0.3989 |
| Apnea hypopnea index               | 28.17±24.48           | 25.04±24.59           | 0.7010 | 9.61±12.4             | 10.43±9.7             | 0.8214 |

Percentage (%) of total population (number of participants), mean ± standard deviation. All p-values were obtained using two-sample independent t-tests. Abbreviations: SNUBH Seoul National Bundang Hospital, CLC Clonic Life Center.
