# Supplementary material for: Accuracy of 11 Wearable, Nearable, and Airable Consumer Sleep Trackers: Prospective Multicenter Validation Study
Source: PubMed Central journal article supplement (PMC10654909; doi:10.2196/50983), 2023-11-02
Supplement: mhealth_v11i1e50983_app3.pdf [file mhealth_v11i1e50983_app3.pdf]

**Multimedia Appendix 3.** Epoch-by-epoch agreement: wake stage classification.

| Device                           | Sensitivity   | Specificity   | Accuracy      | F1 score      | Weighted F1   | AUROC         |
|----------------------------------|---------------|---------------|---------------|---------------|---------------|---------------|
| <b>Airable</b>                   |               |               |               |               |               |               |
| SleepRoutine (67)                | <b>0.7246</b> | 0.9269        | <b>0.8898</b> | <b>0.7065</b> | <b>0.8909</b> | <b>0.8257</b> |
| SleepScore (38)                  | 0.3665        | 0.8696        | 0.7546        | 0.4057        | 0.7449        | 0.6180        |
| Pillow (74)                      | 0.1934        | 0.9572        | 0.8066        | 0.2828        | 0.7688        | 0.5753        |
| <b>Nearable</b>                  |               |               |               |               |               |               |
| Withings Sleep Tracking Mat (75) | 0.4172        | 0.8854        | 0.7938        | 0.4419        | 0.7890        | 0.6513        |
| Google Nest Hub 2 (33)           | 0.3068        | 0.8649        | 0.7556        | 0.3296        | 0.7485        | 0.5858        |
| Amazon Halo Rise (28)            | 0.6612        | 0.8921        | 0.8545        | 0.5967        | 0.8600        | 0.7767        |
| <b>Wearable</b>                  |               |               |               |               |               |               |
| Google Pixel Watch (30)          | 0.2277        | <b>0.9784</b> | 0.8329        | 0.3456        | 0.7959        | 0.6030        |
| Galaxy Watch 5 (22)              | 0.4814        | 0.9104        | 0.8496        | 0.4755        | 0.8504        | 0.6959        |
| Fitbit Sense 2 (26)              | 0.2714        | 0.9602        | 0.8189        | 0.3807        | 0.7887        | 0.6158        |
| Apple Watch 8 (26)               | 0.4481        | 0.9624        | 0.8748        | 0.5493        | 0.8630        | 0.7052        |
| Oura Ring 3 (53)                 | 0.3822        | 0.9264        | 0.8209        | 0.4527        | 0.8076        | 0.6543        |

Wake stages were used to classify the wake class and the remaining classes. The top performing consumer sleep trackers are shown in bold. Abbreviation: AUROC, area under receiver operating characteristic curve.
