# Supplementary material for: Accuracy of 11 Wearable, Nearable, and Airable Consumer Sleep Trackers: Prospective Multicenter Validation Study
Source: PubMed Central journal article supplement (PMC10654909; doi:10.2196/50983), 2023-11-02
Supplement: mhealth_v11i1e50983_app4.pdf [file mhealth_v11i1e50983_app4.pdf]

**Multimedia Appendix 4.** Epoch-by-epoch agreement: light stage classification.

| Device                           | Sensitivity   | Specificity   | Accuracy      | F1 score      | Weighted F1   | AUROC         |
|----------------------------------|---------------|---------------|---------------|---------------|---------------|---------------|
| <b>Airable</b>                   |               |               |               |               |               |               |
| SleepRoutine (67)                | 0.7054        | <b>0.7665</b> | <b>0.7330</b> | <b>0.7436</b> | <b>0.7336</b> | <b>0.7360</b> |
| SleepScore (38)                  | 0.4355        | 0.7272        | 0.5769        | 0.5147        | 0.5681        | 0.5813        |
| Pillow (74)                      | 0.2490        | 0.7534        | 0.4822        | 0.3409        | 0.4485        | 0.5012        |
| <b>Nearable</b>                  |               |               |               |               |               |               |
| Withings Sleep Tracking Mat (75) | 0.5328        | 0.6336        | 0.5795        | 0.5764        | 0.5793        | 0.5832        |
| Google Nest Hub 2 (33)           | 0.5772        | 0.4518        | 0.5188        | 0.5619        | 0.5174        | 0.5145        |
| Amazon Halo Rise (28)            | 0.6609        | 0.7484        | 0.6985        | 0.7142        | 0.6999        | 0.7047        |
| <b>Wearable</b>                  |               |               |               |               |               |               |
| Google Pixel Watch (30)          | <b>0.7657</b> | 0.5620        | 0.6716        | 0.7150        | 0.6677        | 0.6638        |
| Galaxy Watch 5 (22)              | 0.7280        | 0.6412        | 0.6920        | 0.7346        | 0.6925        | 0.6846        |
| Fitbit Sense 2 (26)              | 0.7734        | 0.5727        | 0.6821        | 0.7262        | 0.6784        | 0.6730        |
| Apple Watch 8 (26)               | 0.6649        | 0.5737        | 0.6254        | 0.6680        | 0.6257        | 0.6193        |
| Oura Ring 3 (53)                 | 0.5072        | 0.7630        | 0.6233        | 0.5953        | 0.6191        | 0.6351        |

Light stage classification was used to for light class and the remaining classes. The top performing consumer sleep trackers are shown in bold. Abbreviation: *AUROC*, area under receiver operating characteristic curve.
