# Supplementary material for: Accuracy of 11 Wearable, Nearable, and Airable Consumer Sleep Trackers: Prospective Multicenter Validation Study
Source: PubMed Central journal article supplement (PMC10654909; doi:10.2196/50983), 2023-11-02
Supplement: mhealth_v11i1e50983_app5.pdf [file mhealth_v11i1e50983_app5.pdf]

**Multimedia Appendix 5.** Epoch-by-epoch agreement: deep stage classification.

| Device                           | Sensitivity   | Specificity   | Accuracy      | F1 score      | Weighted F1   | AUROC         |
|----------------------------------|---------------|---------------|---------------|---------------|---------------|---------------|
| <b>Airable</b>                   |               |               |               |               |               |               |
| SleepRoutine (67)                | 0.6712        | 0.8973        | 0.8725        | 0.5355        | 0.8833        | 0.7842        |
| SleepScore (38)                  | 0.5247        | 0.8264        | 0.7933        | 0.3574        | 0.8200        | 0.6755        |
| Pillow (74)                      | 0.8594        | 0.4449        | 0.4898        | 0.2673        | 0.5717        | 0.6522        |
| <b>Nearable</b>                  |               |               |               |               |               |               |
| Withings Sleep Tracking Mat (75) | 0.5633        | 0.8270        | 0.7981        | 0.3800        | 0.8245        | 0.6952        |
| Google Nest Hub 2 (33)           | 0.1308        | 0.8883        | 0.8102        | 0.1245        | 0.8142        | 0.5096        |
| Amazon Halo Rise (28)            | 0.5467        | 0.9018        | 0.8647        | 0.4575        | 0.8742        | 0.7242        |
| <b>Wearable</b>                  |               |               |               |               |               |               |
| Google Pixel Watch (30)          | 0.6937        | 0.9290        | <b>0.9057</b> | <b>0.5922</b> | <b>0.9117</b> | 0.8113        |
| Galaxy Watch 5 (22)              | 0.4752        | <b>0.9481</b> | 0.8982        | 0.4963        | 0.8962        | 0.7117        |
| Fitbit Sense 2 (26)              | 0.6710        | 0.9247        | 0.9013        | 0.5564        | 0.9087        | <b>0.7979</b> |
| Apple Watch 8 (26)               | 0.4130        | 0.8412        | 0.7937        | 0.3073        | 0.8155        | 0.6271        |
| Oura Ring 3 (53)                 | <b>0.7784</b> | 0.7974        | 0.7955        | 0.4272        | 0.8316        | 0.7879        |

Deep stage classification was used to classify the deep class and the remaining classes. The top performing consumer sleep trackers are shown in bold. Abbreviation: *AUROC*, area under receiver operating characteristic curve.
