# Supplementary material for: Accuracy of 11 Wearable, Nearable, and Airable Consumer Sleep Trackers: Prospective Multicenter Validation Study
Source: PubMed Central journal article supplement (PMC10654909; doi:10.2196/50983), 2023-11-02
Supplement: mhealth_v11i1e50983_app6.pdf [file mhealth_v11i1e50983_app6.pdf]

**Multimedia Appendix 6.** Epoch-by-epoch agreement: rapid eye movement stage classification.

| Device                           | Sensitivity   | Specificity   | Accuracy      | F1 score      | Weighted F1   | AUROC         |
|----------------------------------|---------------|---------------|---------------|---------------|---------------|---------------|
| <b>Airable</b>                   |               |               |               |               |               |               |
| SleepRoutine (67)                | 0.7394        | <b>0.9609</b> | <b>0.9258</b> | <b>0.7596</b> | <b>0.9250</b> | <b>0.8502</b> |
| SleepScore (38)                  | 0.4587        | 0.7895        | 0.7409        | 0.3418        | 0.7658        | 0.6241        |
| Pillow (74)                      | 0.1140        | 0.9126        | 0.7874        | 0.1440        | 0.7635        | 0.5133        |
| <b>Nearable</b>                  |               |               |               |               |               |               |
| Withings Sleep Tracking Mat (75) | 0.3964        | 0.8906        | 0.8127        | 0.4001        | 0.8120        | 0.6435        |
| Google Nest Hub 2 (33)           | 0.1805        | 0.8514        | 0.7397        | 0.1876        | 0.7356        | 0.5159        |
| Amazon Halo Rise (28)            | <b>0.7490</b> | 0.9401        | 0.9090        | 0.7283        | 0.9100        | 0.8445        |
| <b>Wearable</b>                  |               |               |               |               |               |               |
| Google Pixel Watch (30)          | 0.6548        | 0.9029        | 0.8608        | 0.6146        | 0.8641        | 0.7788        |
| Galaxy Watch 5 (22)              | 0.6265        | 0.9058        | 0.8590        | 0.5982        | 0.8615        | 0.7661        |
| Fitbit Sense 2 (26)              | 0.6812        | 0.9297        | 0.8906        | 0.6623        | 0.8918        | 0.8055        |
| Apple Watch 8 (26)               | 0.4276        | 0.9070        | 0.8340        | 0.4394        | 0.8321        | 0.6673        |
| Oura Ring 3 (53)                 | 0.7118        | 0.8716        | 0.8456        | 0.5993        | 0.8549        | 0.7917        |

REM stage classification was used to classify the REM class and the remaining classes. The top performing consumer sleep trackers are shown in bold. Abbreviations: *AUROC* area under receiver operating characteristic curve; *REM*, rapid-eye movement sleep.
