# Supplementary material for: Accuracy of 11 Wearable, Nearable, and Airable Consumer Sleep Trackers: Prospective Multicenter Validation Study
Source: PubMed Central journal article supplement (PMC10654909; doi:10.2196/50983), 2023-11-02
Supplement: mhealth_v11i1e50983_app9.pdf [file mhealth_v11i1e50983_app9.pdf]

**Table S9. Epoch-by-epoch agreement: subgroup analysis of AHI and demographic characteristics in SNUBH (Macro F1 Score)**

|                                  | Apnea-Hypopnea Index |               | Sleep Efficiency |               | Body Mass Index |               | Gender        |               |
|----------------------------------|----------------------|---------------|------------------|---------------|-----------------|---------------|---------------|---------------|
|                                  | ≤ 15                 | > 15          | ≤ 85%            | > 85%         | ≤ 25            | > 25          | Male          | Female        |
| <b>Airable</b>                   |                      |               |                  |               |                 |               |               |               |
| SleepRoutine (29)                | <b>0.7032</b>        | <b>0.7259</b> | <b>0.7004</b>    | <b>0.7000</b> | <b>0.7281</b>   | <b>0.7036</b> | <b>0.7115</b> | <b>0.7212</b> |
| SleepScore (26)                  | 0.4120               | 0.4646        | 0.4350           | 0.4316        | 0.4341          | 0.4476        | 0.4554        | 0.4081        |
| Pillow (37)                      | 0.2817               | 0.2451        | 0.2398           | 0.2729        | 0.2478          | 0.2751        | 0.2576        | 0.2567        |
| <b>Nearable</b>                  |                      |               |                  |               |                 |               |               |               |
| Withings Sleep Tracking Mat (37) | 0.4246               | 0.4109        | 0.3605           | 0.4557        | 0.4475          | 0.3791        | 0.4255        | 0.3913        |
| Google Nest Hub 2 (14)           | 0.2281               | 0.3030        | 0.2671           | 0.2386        | 0.2801          | 0.2259        | 0.2555        | 0.2476        |
| Amazon Halo Rise (12)            | 0.6250               | 0.6121        | 0.6268           | 0.5743        | 0.6340          | 0.5814        | 0.6031        | 0.6782        |
| <b>Wearable</b>                  |                      |               |                  |               |                 |               |               |               |
| Google Pixel Watch (12)          | 0.5379               | 0.5347        | 0.2671           | 0.2386        | 0.5125          | 0.5945        | 0.5071        | 0.6099        |
| Galaxy Watch 5 (3)               | 0.6317               | 0.6226        | 0.6516           | 0.5738        | 0.6317          | 0.6226        | 0.6516        | 0.5738        |
| Fitbit Sense 2 (9)               | 0.4868               | 0.5244        | 0.4501           | 0.5491        | 0.4926          | 0.5431        | 0.4941        | 0.5887        |
| Apple Watch 8 (8)                | 0.6283               | 0.4341        | 0.5001           | 0.5700        | 0.6204          | 0.4677        | 0.5212        | 0.5965        |
| Oura Ring 3 (22)                 | 0.5599               | 0.4886        | 0.5078           | 0.5076        | 0.5386          | 0.4864        | 0.4939        | 0.5661        |

The number in the parenthesis indicates the number of participants tested with each device. Values for the top-performing consumer sleep trackers are shown in bold. Abbreviations: SNUBH, Seoul National Bundang Hospital; AHI, apnea-hypopnea index.
