# Supplementary material for: Accuracy of 11 Wearable, Nearable, and Airable Consumer Sleep Trackers: Prospective Multicenter Validation Study
Source: PubMed Central journal article supplement (PMC10654909; doi:10.2196/50983), 2023-11-02
Supplement: mhealth_v11i1e50983_app10.pdf [file mhealth_v11i1e50983_app10.pdf]

**Table S10. Epoch-by-epoch agreement: subgroup analysis of AHI and demographic characteristics in CLC (Macro F1 Score)**

|                                  | Apnea-Hypopnea Index |               | Sleep Efficiency |               | Body Mass Index |               | Gender        |               |
|----------------------------------|----------------------|---------------|------------------|---------------|-----------------|---------------|---------------|---------------|
|                                  | ≤ 15                 | > 15          | ≤ 85%            | > 85%         | ≤ 25            | > 25          | Male          | Female        |
| <b>Airable</b>                   |                      |               |                  |               |                 |               |               |               |
| SleepRoutine (38)                | <b>0.6278</b>        | <b>0.7507</b> | <b>0.6769</b>    | <b>0.6164</b> | <b>0.6541</b>   | <b>0.6582</b> | <b>0.7178</b> | <b>0.6228</b> |
| SleepScore (12)                  | 0.2920               | 0.3743        | 0.2401           | 0.2961        | 0.3297          | 0.2843        | 0.2594        | 0.3147        |
| Pillow (37)                      | 0.2427               | 0.2947        | 0.2635           | 0.2428        | 0.2724          | 0.2155        | 0.2996        | 0.2344        |
| <b>Nearable</b>                  |                      |               |                  |               |                 |               |               |               |
| Withings Sleep Tracking Mat (38) | 0.4859               | 0.4601        | 0.4176           | 0.4722        | 0.4990          | 0.4356        | 0.5436        | 0.4568        |
| Google Nest Hub 2 (19)           | 0.3325               | 0.3149        | 0.3463           | 0.3006        | 0.3542          | 0.2489        | 0.4100        | 0.3142        |
| Amazon Halo Rise (16)            | 0.5868               | 0.6473        | 0.6463           | 0.5905        | 0.6164          | 0.5515        | 0.5924        | 0.6113        |
| <b>Wearable</b>                  |                      |               |                  |               |                 |               |               |               |
| Google Pixel Watch (18)          | 0.5819               | 0.6402        | 0.5499           | 0.6280        | 0.6109          | 0.5716        | 0.6045        | 0.5889        |
| Galaxy Watch 5 (19)              | 0.5617               | 0.5543        | 0.5757           | 0.5523        | 0.5444          | 0.6232        | 0.5396        | 0.5900        |
| Fitbit Sense 2 (17)              | 0.6118               | 0.6886        | 0.5767           | 0.6521        | 0.6438          | 0.5641        | 0.6773        | 0.6182        |
| Apple Watch 8 (18)               | 0.3765               | 0.5811        | 0.1568           | 0.4626        | 0.4263          | 0.4020        | 0.4990        | 0.3466        |
| Oura Ring 3 (31)                 | 0.5176               | 0.5244        | 0.4636           | 0.5360        | 0.5381          | 0.4789        | 0.4936        | 0.5316        |

The number in the parenthesis indicates the number of participants tested with each device. Values for the top-performing consumer sleep trackers are shown in bold. Abbreviations: CLC, Clionic Life Center; AHI, apnea-hypopnea index.
