# Supplementary material for: Accuracy of 11 Wearable, Nearable, and Airable Consumer Sleep Trackers: Prospective Multicenter Validation Study
Source: PubMed Central journal article supplement (PMC10654909; doi:10.2196/50983), 2023-11-02
Supplement: mhealth_v11i1e50983_app11.pdf [file mhealth_v11i1e50983_app11.pdf]

**Multimedia Appendix 11.** Epoch-by-epoch agreement: subgroup analysis of the apnea-hypopnea index.

| Device                           | AHI           |               | AHI           |               |
|----------------------------------|---------------|---------------|---------------|---------------|
|                                  | ≤ 5           | > 5           | ≤ 30          | > 30          |
| <b>Airable</b>                   |               |               |               |               |
| SleepRoutine (67)                | 0.6317        | <b>0.7073</b> | <b>0.6773</b> | <b>0.7119</b> |
| SleepScore (38)                  | 0.3489        | 0.4234        | 0.4099        | 0.3870        |
| Pillow (74)                      | 0.2731        | 0.2526        | 0.2632        | 0.2398        |
| <b>Nearable</b>                  |               |               |               |               |
| Withings Sleep Tracking Mat (75) | 0.4623        | 0.4434        | 0.4642        | 0.3883        |
| Google Nest Hub 2 (33)           | 0.3505        | 0.2815        | 0.3078        | 0.2564        |
| Amazon Halo Rise (28)            | <b>0.6337</b> | 0.6192        | 0.6162        | 0.6567        |
| <b>Wearable</b>                  |               |               |               |               |
| Google Pixel Watch (30)          | 0.5972        | 0.5559        | 0.5529        | 0.6141        |
| Galaxy Watch 5 (22)              | 0.5803        | 0.5741        | 0.5753        | 0.5868        |
| Fitbit Sense 2 (26)              | 0.6216        | 0.5611        | 0.5721        | 0.6179        |
| Apple Watch 8 (26)               | 0.4303        | 0.5290        | 0.5279        | 0.2170        |
| Oura Ring 3 (53)                 | 0.5506        | 0.5097        | 0.5165        | 0.5261        |

Values of the top-performing CSTs are shown in bold. Abbreviations: *AHI*, apnea-hypopnea index; *CST*, consumer sleep tracker.
