# Supplementary material for: Accuracy of 11 Wearable, Nearable, and Airable Consumer Sleep Trackers: Prospective Multicenter Validation Study
Source: PubMed Central journal article supplement (PMC10654909; doi:10.2196/50983), 2023-11-02
Supplement: mhealth_v11i1e50983_app15.pdf [file mhealth_v11i1e50983_app15.pdf]

**Multimedia Appendix 15.** Group-averaged macro F1 scores: subgroup analysis of the apnea-hypopnea index and demographic characteristics in Clionic Lifecare Clinic.

|                                  | AHI           |              |              | Sleep Efficiency |               |               | Body Mass Index |               |               | Gender        |               |        |
|----------------------------------|---------------|--------------|--------------|------------------|---------------|---------------|-----------------|---------------|---------------|---------------|---------------|--------|
|                                  | ≤ 15          | > 15         | P            | ≤ 85%            | > 85%         | P             | ≤ 25            | > 25          | P             | Male          | Female        | P      |
| <b>Airable</b>                   |               |              |              |                  |               |               |                 |               |               |               |               |        |
| SleepRoutine (38)                | 0.54±0.14(30) | 0.68±0.07(8) | <b>0.012</b> | 0.57±0.19(9)     | 0.57±0.12(29) | 0.9499        | 0.57±0.13(28)   | 0.59±0.16(10) | 0.6541        | 0.63±0.1(12)  | 0.54±0.14(26) | 0.0587 |
| SleepScore (12)                  | 0.25±0.11(10) | 0.37±0.13(2) | 0.2657       | 0.21±0.02(3)     | 0.29±0.14(9)  | 0.4221        | 0.31±0.16(6)    | 0.23±0.04(6)  | 0.2963        | 0.24±0.0(2)   | 0.28±0.14(10) | 0.7527 |
| Pillow (37)                      | 0.22±0.1(30)  | 0.22±0.06(7) | 0.9687       | 0.23±0.13(9)     | 0.22±0.08(28) | 0.9326        | 0.23±0.09(27)   | 0.2±0.11(10)  | 0.3346        | 0.23±0.07(12) | 0.22±0.11(25) | 0.6755 |
| <b>Nearable</b>                  |               |              |              |                  |               |               |                 |               |               |               |               |        |
| Withings Sleep Tracking Mat (38) | 0.42±0.15(30) | 0.38±0.14(8) | 0.5694       | 0.34±0.16(9)     | 0.43±0.14(29) | 0.0952        | 0.42±0.15(28)   | 0.38±0.16(10) | 0.5591        | 0.46±0.11(12) | 0.39±0.16(26) | 0.1826 |
| Google Nest Hub 2 (19)           | 0.3±0.11(16)  | 0.28±0.03(3) | 0.7758       | 0.31±0.13(6)     | 0.29±0.09(13) | 0.7409        | 0.32±0.08(14)   | 0.24±0.13(5)  | 0.1788        | 0.38±0.06(2)  | 0.29±0.11(17) | 0.2574 |
| Amazon Halo Rise (16)            | 0.55±0.07(13) | 0.63±0.02(3) | 0.0835       | 0.65±0.0(1)      | 0.56±0.07(15) | -             | 0.57±0.07(12)   | 0.54±0.07(4)  | 0.5254        | 0.56±0.08(8)  | 0.57±0.06(8)  | 0.6740 |
| <b>Wearable</b>                  |               |              |              |                  |               |               |                 |               |               |               |               |        |
| Google Pixel Watch (18)          | 0.55±0.18(15) | 0.59±0.09(3) | 0.7245       | 0.47±0.25(6)     | 0.59±0.07(12) | 0.1535        | 0.57±0.08(13)   | 0.5±0.29(5)   | 0.4219        | 0.6±0.11(2)   | 0.55±0.17(16) | 0.6642 |
| Galaxy Watch 5 (19)              | 0.51±0.11(14) | 0.52±0.09(5) | 0.8354       | 0.44±0.11(3)     | 0.52±0.1(16)  | 0.2216        | 0.48±0.11(14)   | 0.6±0.05(5)   | <b>0.0304</b> | 0.49±0.1(10)  | 0.53±0.11(9)  | 0.4871 |
| Fitbit Sense 2 (17)              | 0.56±0.17(14) | 0.63±0.09(3) | 0.5236       | 0.51±0.24(6)     | 0.61±0.07(11) | 0.2346        | 0.59±0.07(13)   | 0.49±0.29(4)  | 0.3002        | 0.66±0.06(2)  | 0.56±0.17(15) | 0.4262 |
| Apple Watch 8 (18)               | 0.38±0.19(14) | 0.57±0.2(4)  | 0.1072       | 0.15±0.06(2)     | 0.45±0.19(16) | <b>0.0490</b> | 0.43±0.21(13)   | 0.4±0.21(5)   | 0.8432        | 0.49±0.21(9)  | 0.35±0.17(9)  | 0.1471 |
| Oura Ring 3 (31)                 | 0.48±0.13(25) | 0.52±0.11(6) | 0.4699       | 0.44±0.2(9)      | 0.5±0.06(22)  | 0.1852        | 0.49±0.09(23)   | 0.48±0.19(8)  | 0.9234        | 0.47±0.09(9)  | 0.49±0.13(22) | 0.6314 |

The number in the parenthesis indicates the number of participants tested with each device. Mean ± standard deviation of macro-averaged F1 scores across participants. The bold values represent statistical significance ( $p < 0.05$ ). Abbreviations: *CLC*, Clionic Life Center; *AHI*, Apnea-Hypopnea Index.
